# Supplementary material
Source: ML conference proceedings conference paper supplement (https://openaccess.thecvf.com/content/CVPR2022/html/Gong_Bi-Level_Alignment_for_CVPR_2022_paper.html)
Supplement: Supplementary file 1 [file Gong_Bi-Level_Alignment_for_CVPR_2022_supplemental.pdf]

# Bi-level Alignment for Cross-Domain Crowd Counting

## Supplementary Material

Shenjian Gong<sup>1</sup>, Shanshan Zhang<sup>1,\*</sup>, Jian Yang<sup>1</sup>, Dengxin Dai<sup>2</sup>, and Bernt Schiele<sup>2</sup>

<sup>1</sup>PCA Lab, Key Lab of Intelligent Perception and Systems for High-Dimensional Information of Ministry of Education, and Jiangsu Key Lab of Image and Video Understanding for Social Security, School of Computer Science and Engineering, Nanjing University of Science and Technology

<sup>2</sup>MPI Informatics

{shenjiangong, shanshan.zhang, csjyang}@njust.edu.cn

{ddai, schiele}@mpi-inf.mpg.de

In this supplementary material, we first provide additional ablation studies, which are all implemented on SHA; and then we illustrate the detailed architecture of our network.

### S1. Impact of Segmentation Threshold

For each image, we obtain its ground truth density map as follows:

$$y(n) = \sum_{i=1}^N \delta(n - a_i) * G_{\sigma}(n), \quad (1)$$

where  $n$  denotes the pixel index;  $a_i$  represents the  $i$ -th annotated head point (total  $N$  points);  $\delta$  is the delta function;  $G_{\sigma}$  is the Gaussian kernel with a size of  $15 \times 15$  and a variance of  $\sigma = 4$ .

Our fine-grained feature alignment strategy does feature alignment on foreground and background separately. To separate foreground and background regions from the density maps, we apply a threshold close to zero on each local patch. We analyze how the segmentation threshold  $th$  affects the performance. As shown in Tab. S1, the value of  $th$  has a very small impact on the counting performance, indicating that our method is not sensitive to it. Since 0.005 gives the best performance, we choose  $th = 0.005$  for all our experiments.

### S2. Style Transfer from S+ to Target

Our task-driven data alignment tries to select the best combination of augmentation to reduce the domain gap between the source and target domains. This is not in conflict with style transfer. Therefore we train a style transfer

| Segmentation threshold $th$ | MAE   | MSE   |
|-----------------------------|-------|-------|
| 0.0005                      | 102.9 | 155.7 |
| 0.001                       | 99.4  | 147.9 |
| 0.005                       | 99.3  | 145.0 |

Table S1. Effect of different segmentation threshold  $th$ .

model between the augmented-source (S+) and target domains. From Tab. S2, we can see that a style transfer model between the S<sup>+</sup> and target domain can bring extra improvement.

| Method                   | MAE  | MSE   |
|--------------------------|------|-------|
| S <sup>+</sup> to Target | 97.8 | 145.1 |
| BLA                      | 99.3 | 145.0 |

Table S2. Effect of Style Transfer from S+ to Target.

### S3. Effect of More Transformations

For crowd counting, following [2], we choose RGB2Gray, scaling and perspective transform as our data-augmentation methods. Here, we consider to add other augmentation methods such as brightness, contrast and saturation randomization to our BLA. From Tab. S3, we find more transformations can not bring more improvements. This enlightened us that, for crowd counting, inter-domain differences are mainly reflected in saturation, scale and perspective.

\*Corresponding author

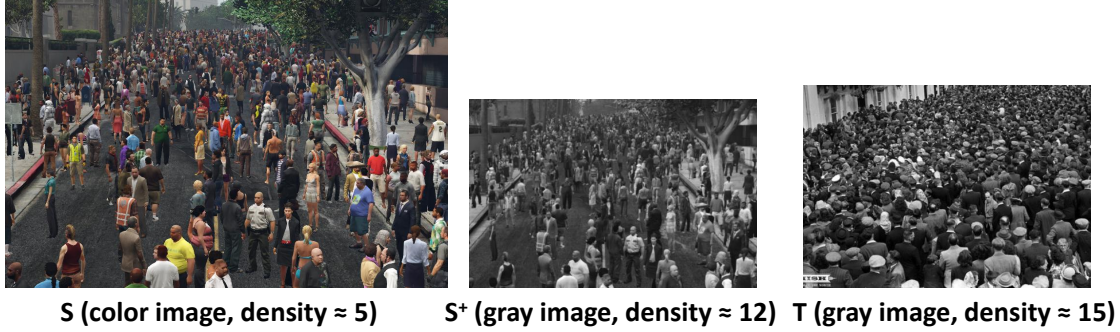

Figure S1. The transformed image ( $S^+$ ) is closer to the target image (T) w.r.t. saturation and density (#heads per  $100 \times 100$  patch).

| Method                    | MAE   | MSE   |
|---------------------------|-------|-------|
| BLA(More Transformations) | 101.1 | 151.6 |
| BLA                       | 99.3  | 145.0 |

Table S3. Effect of More Augmentation Methods.

| Method      | MAE   | MSE   |
|-------------|-------|-------|
| Grid Search | 111.9 | 173.4 |
| Ours        | 99.3  | 145.0 |

Table S4. Effect of our AutoML based search method.

#### S4. How Does Task-Driven Data Alignment Reduce the Domain Gap?

From Fig. S1, by observing the images of the source domain and the target domain, we can find that there are great differences in saturation and crowd density between the two domains. Our task-driven data-alignment mainly aligns the source domain with the target domain in color and content. Data augmentation makes counter more robust to saturation, scale and perspective. On the other hand, smaller inter-domain differences make the model better generalized to the target domain.

**Comparison with Grid Search** In order to illustrate the effect of our AutoML based search algorithm, we compare it with grid search [1], which is a straight forward way of searching. For fair comparison, we implement the experiments in our framework by only replacing our AutoML based search with grid search and keeping other components the same.

For each parameter, we set the size of the grid to 5 and distribute the parameters evenly, specifically, angle  $\in \{0^\circ, 11^\circ, 22^\circ, 33^\circ, 45^\circ\}$ ,  $P_G \in \{0, 0.25, 0.5, 0.75, 1.0\}$ , and scale factor  $\in \{0, 0.25, 0.5, 0.75, 1.0\}$ . We employ candidate transform validation and find the best transform. As shown in Tab. S4, the best results we obtain through grid search is 111.9 w.r.t. MAE and 173.4 w.r.t. MSE. In contrast, our AutoML based search algorithm achieves 99.3 w.r.t. MAE and 145.0 w.r.t. MSE. These results demonstrate the effectiveness of our controller.

#### S5. Detailed Architecture of Our Network

There are four types of layers in our network, including convolutional layer (Conv), fully connected layer (FC), deconvolution layer (Deconv) and max pooling layer (Maxpool). We use the following notation to indicate the settings of a convolutional/deconvolutional layer: Conv/Deconv:  $[k(3,3)\text{-c}256\text{-s}1\text{-BN-Relu}]$  representing a convolutional/deconvolutional operation with a kernel size of  $3 \times 3$ , number of output channels of 256, stride of 1, with Batch Normalization and ReLU applied afterwards. Similarly, Maxpool:  $[k(2,2)\text{-s}2]$  denotes a max pooling layer with a kernel size of  $2 \times 2$  and stride of 2; FC:  $[c16\text{-Relu}]$  represents a fully connected layer with size of 16, activated by Relu. We show the detailed network architecture of our  $\mathcal{F}$ ,  $\mathcal{E}$ ,  $\mathcal{D}$  and controller  $\mathcal{C}$  in Tab. S5.

| Input                       | Layer                                 | Output                            |
|-----------------------------|---------------------------------------|-----------------------------------|
| $\mathcal{F}$               |                                       |                                   |
| $3 \times 576 \times 768$   | Conv:[k(3,3)-c64-s1-Relu] $\times 2$  | $64 \times 576 \times 768$        |
| $64 \times 576 \times 768$  | Maxpool:[k(2,2)-s2]                   | $64 \times 288 \times 384$        |
| $64 \times 288 \times 384$  | Conv:[k(3,3)-c128-s1-Relu] $\times 2$ | $128 \times 288 \times 384$       |
| $128 \times 288 \times 384$ | Maxpool:[k(2,2)-s2]                   | $128 \times 144 \times 192$       |
| $128 \times 144 \times 192$ | Conv:[k(3,3)-c256-s1-Relu] $\times 3$ | $256 \times 144 \times 192$       |
| $256 \times 144 \times 192$ | Maxpool:[k(2,2)-s2]                   | $256 \times 72 \times 96$         |
| $256 \times 72 \times 96$   | Conv:[k(3,3)-c512-s1-Relu] $\times 3$ | $512 \times 72 \times 96$         |
| $\mathcal{E}$               |                                       |                                   |
| $512 \times 72 \times 96$   | Conv:[k(3,3)-c128-s1-BN-Relu]         | $128 \times 72 \times 96$         |
| $128 \times 72 \times 96$   | Deconv:[k(2,2)-c128-s2-BN-Relu]       | $128 \times 144 \times 192$       |
| $128 \times 144 \times 192$ | Conv:[k(3,3)-c64-s1-BN-Relu]          | $64 \times 144 \times 192$        |
| $64 \times 144 \times 192$  | Deconv:[k(2,2)-c64-s2-BN-Relu]        | $64 \times 288 \times 384$        |
| $64 \times 288 \times 384$  | Conv:[k(3,3)-c32-s1-BN-Relu]          | $32 \times 288 \times 384$        |
| $32 \times 288 \times 384$  | Deconv:[k(2,2)-c32-s2-BN-Relu]        | $32 \times 576 \times 768$        |
| $32 \times 576 \times 768$  | Conv:[k(3,3)-c1-s1-Relu]              | $32 \times 576 \times 768$        |
| $\mathcal{D}$               |                                       |                                   |
| $512 \times 72 \times 96$   | Conv:[k(3,3)-c512-s1-LeakyReLU]       | $512 \times 72 \times 96$         |
| $512 \times 72 \times 96$   | Conv:[k(3,3)-c256-s1-LeakyReLU]       | $256 \times 72 \times 96$         |
| $256 \times 72 \times 96$   | Conv:[k(3,3)-c2-s1]                   | $2 \times 72 \times 96$           |
| $2 \times 72 \times 96$     | Resize                                | $2 \times (H/g_h) \times (W/g_w)$ |
| $\mathcal{C}$               |                                       |                                   |
| 3                           | FC:[c16-Relu]                         | 16                                |
| 16                          | FC:[c32-Relu]                         | 32                                |
| 32                          | FC:[c64-Relu]                         | 64                                |
| 64                          | FC:[c1-Relu]                          | 1 ( $\tilde{p}_k$ )               |
| 64                          | FC:[c32-Relu]                         | 32                                |
| 32                          | FC:[c16-Relu]                         | 16                                |
| 16                          | FC:[c3-Relu]                          | 3 ( $\tilde{d}_k$ )               |

Table S5. The network architecture of  $\mathcal{F}$ ,  $\mathcal{E}$ ,  $\mathcal{D}$  and controller  $\mathcal{C}$ .

## References

- [1] Petro Liashchynskiy and Pavlo Liashchynskiy. Grid search, random search, genetic algorithm: a big comparison for nas. *arXiv*, 2019. 2
- [2] Yongtuo Liu, Qiang Wen, Haoxin Chen, Wenxi Liu, Jing Qin, Guoqiang Han, and Shengfeng He. Crowd counting via cross-stage refinement networks. *IEEE TIP*, 29:6800–6812, 2020. 1
